# Supplementary material
Source: PubMed Central journal article supplement (PMC10518983)
Supplement: media-1.pdf [file media-1.pdf]

### Figure 1 – figure supplement 1

DNA sequence for ASIC1a from rat used in this study. Conservative mutations to lessen alternative initiation highlighted in cyan and cysteine to serine mutations highlighted in yellow. Amino acid translation is above in red.

```
M E L K T E E E E V G G V Q P V S L Q A
ATGGAACTCAAACCGAGGAGGAGGAGGTCGGTGGTGTCCAGCCGGTCAGCCATCCAGGCT
      10      20      30      40      50

F A S S S T L H G L A H I F S Y E R L S
TTCGCCAGCAGCTCCACCTTCATGGTCTCGCCACATCTTCTCCTATGAGCGGCTGTCT
      70      80      90     100     110

L K R A L W A L C F L G S L A V L L C V
CTGAAGCGGGCACTGTGGGCCCTGTGCTTCTGGGTCGCTGGCCGTCCTGCTGTGTGTG
     130     140     150     160     170

C T E R V Q Y Y F C Y H H V T K L D E V
TGCACTGAGCGTGTGCAGTACTACTTCTGCTATCACCACGTCACCAAGCTTGACGAAGTG
     190     200     210     220     230

A A S Q L T F P A V T L C N L N E F R F
GCTGCCTCCCAGCTCACCTTCCCTGCTGTCACACTGTGCAATCTCAATGAGTTCCGCTTT
     250     260     270     280     290

S Q V S K N D L Y H A G E L L A L L N N
AGCCAAGTCTCCAAGAATGACCTGTACCATGCTGGGGAGCTGCTGGCCCTGCTCAACAAC
     310     320     330     340     350

R Y E I P D T Q M A D E K Q L E I L Q D
AGGTATGAGATCCCGGACACACAGATGGCTGATGAAAAGCAGCTAGAGATATTGCAGGAC
     370     380     390     400     410

K A N F R S F K P K P F N M R E F Y D R
AAGGCCAACTTCCGGAGCTTCAAGCCCAAGCCCTTCAACATGCGTGAATTCTACGACAGA
     430     440     450     460     470

A G H D I R D M L L S C H F R G E A C S
GCGGGGCACGATATTCGAGACATGCTGCTCTCGTGCCACTTCCGTGGGGAGGCCTGCAGC
     490     500     510     520     530

A E D F K V V F T R Y G K C Y T F N S G
GCTGAAGATTTCAAAGTGGTCTTCACTCGGTATGGGAAGTGTTACACATTCAACTCGGGC
     550     560     570     580     590
```

Q D G R P R L K T M K G G T G N G L E I  
CAAGATGGGCGGCCACGGCTGAAGACCATGAAAGGTGGGACTGGCAATGGCCTGGAGATC  
610 620 630 640 650

M L D I Q Q D E Y L P V W G E T D E T S  
ATGCTGGACATTCAGCAAGATGAATATTTGCCTGTGTGGGAGAGACCGACGAGACATCC  
670 680 690 700 710

F E A G I K V Q I H S Q D E P P F I D Q  
TTCGAAGCAGGCATCAAAGTGCAGATCCACAGTCAGGATGAACCCCCTTTCATCGACCAG  
730 740 750 760 770

L G F G V A P G F Q T F V S C Q E Q R L  
CTGGGCTTTGGGTGGCTCCAGGTTTCCAGACGTTTGTGTCTTGCCAGGAGCAGAGGCTC  
790 800 810 820 830

I Y L P S P W G T C N A V T M D S D F F  
ATCTACCTGCCCTCACCCCTGGGGCACCTGCAATGCTGTTACCATGGACTCGGATTTCTTC  
850 860 870 880 890

D S Y S I T A C R I D C E T R Y L V E N  
GACTCCTACAGCATCACTGCCTGCCGGATTGATTGCGAGACGCGTTACCTGGTGGAGAAC  
910 920 930 940 950

C N C R M V H M P G D A P Y C T P E Q Y  
TGCAACTGCCGTATGGTGCACATGCCAGGGGACGCCCCATACTGCACTCCAGAGCAGTAC  
970 980 990 1000 1010

K E C A D P A L D F L V E K D Q E Y C V  
AAGGAGTGTGCAGATCCTGCCCTGGACTTCTAGTGGAGAAAGACCAGGAATACTGCGTG  
1030 1040 1050 1060 1070

C E M P C N L T R Y G K E L S M V K I P  
TGTGAGATGCCTTGCAACCTGACCCGCTACGGCAAGGAGCTGTCCATGGTCAAGATCCCA  
1090 1100 1110 1120 1130

S K A S A K Y L A K K F N K S E Q Y I G  
AGCAAAGCCTCCGCCAAGTACCTGGCCAAGAAGTTCAACAAATCGGAGCAGTACATAGGG  
1150 1160 1170 1180 1190

E N I L V L D I F F E V L N Y E T I E Q  
GAGAACATTTCTGGTGCTGGACATTTTCTTTGAAGTCCTCAACTATGAGACCATCGAGCAG  
1210 1220 1230 1240 1250

K K A Y E I A G L L G D I G G Q M G L F

AAAAAGGCCTATGAGATCGCAGGGCTGTTGGGTGACATCGGGGGCCAGATGGGGTTGTTC  
1270 1280 1290 1300 1310

I G A S I L T V L E L F D Y A Y E V I K  
ATCGGTGCCAGCATCCTCACCGTGCTGGAACCTTTGACTATGCCTACGAGGTCATTAAG  
1330 1340 1350 1360 1370

H R L S R R G K C Q K E A K R S S A D K  
CACAGGCTGTCCAGACGTGGAAAGTGCCAGAAGGAGGCTAAGAGGAGCAGCGCAGACAAG  
1390 1400 1410 1420 1430

G V A L S L D D V K R H N P S E S L R G  
GGCGTGGCGCTCAGCCTGGATGACGTCAAAGACACAATCCCTCCGAGAGCCTCCGAGGA  
1450 1460 1470 1480 1490

H P A G M T Y A A N I L P H H P A R G T  
CATCCTGCCGGGATGACGTACGCTGCCAACATCCTACCTACCATCCCGCTCGAGGCACG  
1510 1520 1530 1540 1550

F E D F T S  
TTTGAGGACTTTACCTCC  
1570

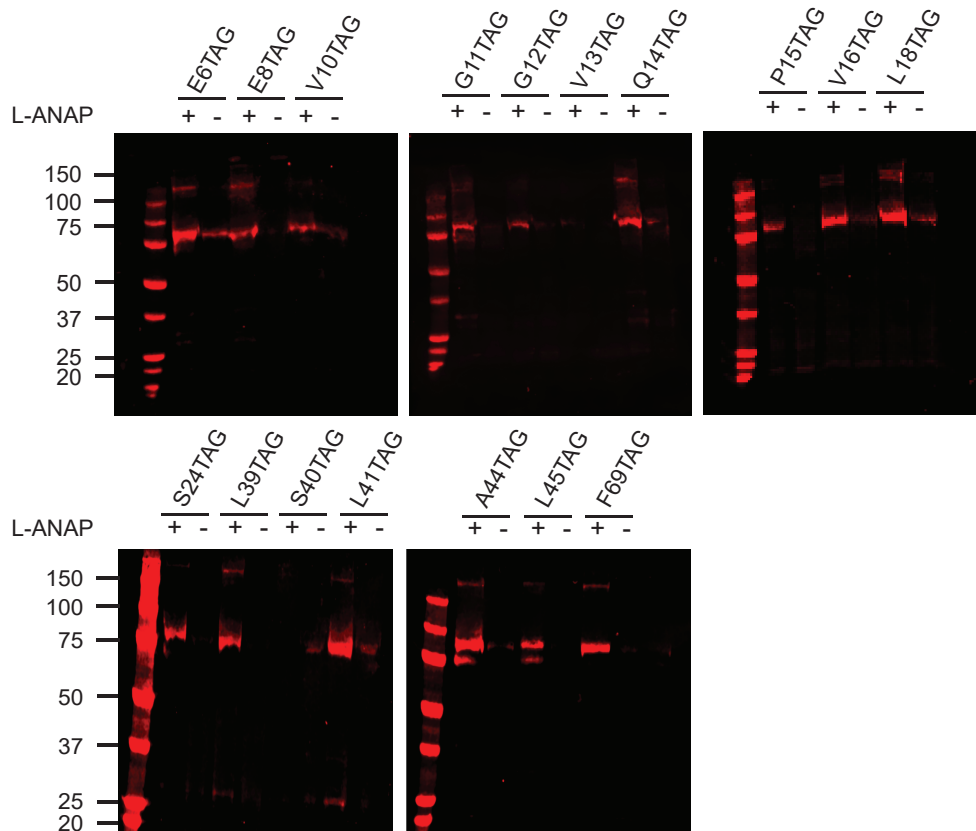

### Figure 2 - figure supplement 1

Representative western blots for all TAG mutants created in this study. Westerns were blotted with an anti-GFP antibody that recognizes the terminal mCitrine. Each TAG mutant was cultured both with L-ANAP (10 $\mu$ M) and without L-ANAP supplementation. Westerns in this figure were run on Bis-Tris gels, whereas the westerns in Figure 2 were run on Tris-Glycine gels, which results in ASIC running slightly differently between the 2 gel types.

**Figure 2- supplement table 1**

pH<sub>50</sub> from 2C with N and SEM for each TAG position.

|            |                  |      |
|------------|------------------|------|
| C469<br>WT | pH <sub>50</sub> | 6.52 |
|            | SEM              | 0.01 |
|            | n                | 5    |
| E8TAG      | pH <sub>50</sub> | 6.66 |
|            | SEM              | 0.01 |
|            | n                | 3    |
| G11TAG     | pH <sub>50</sub> | 6.58 |
|            | SEM              | 0.02 |
|            | n                | 4    |
| Q14TAG     | pH <sub>50</sub> | 6.42 |
|            | SEM              | 0.02 |
|            | n                | 5    |
| 505TAG     | pH <sub>50</sub> | 6.58 |
|            | SEM              | 0.02 |
|            | n                | 4    |

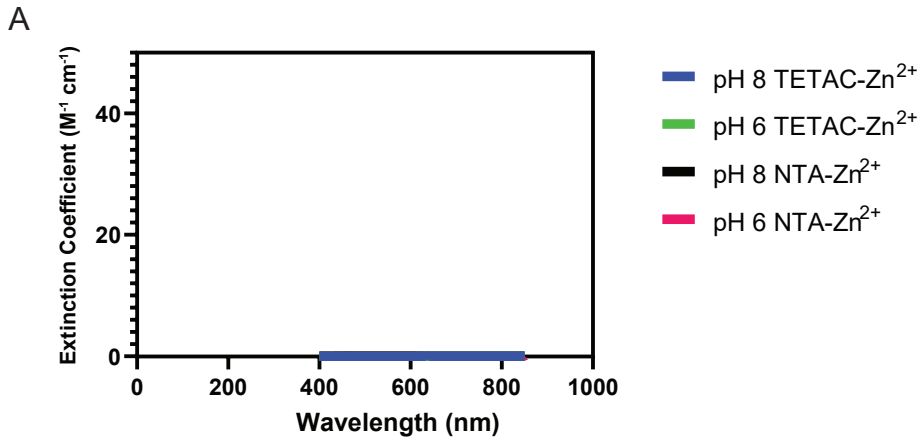

**Figure 3 – figure supplement 1**

(A) Spectral properties of  $Zn^{2+}$ -TETAC and  $Zn^{2+}$ -C18-NTA at pH 8 and pH 6 .

**Figure 6- table supplement 1**

P-values of relevant comparisons between NTD TAG positions with cysteine at C469 at pH 8 and pH 6. P values were calculated using two-way ANOVA with Tukey's multiple comparisons test.

|                     | <b>TAG position comparison</b> | <b>P value</b> |
|---------------------|--------------------------------|----------------|
| <b>pH 8 vs pH 6</b> | E8TAG pH 8 vs. E8TAG pH 6      | 0.1068         |
|                     | G11TAG pH 8 vs. G11TAG pH 6    | 0.0091         |
|                     | Q14TAG pH 8 vs. Q14TAG pH 6    | <0.0001        |
|                     | S24TAG pH 8 vs. S24TAG pH 6    | 0.0069         |
|                     | I33TAG pH 8 vs. I33TAG pH 6    | <0.0001        |
|                     | A44TAG pH 8 vs. A44TAG pH 6    | <0.0001        |
| <b>pH 8 vs pH 8</b> | E8TAG pH 8 vs. G11TAG pH 8     | 0.9991         |
|                     | E8TAG pH 8 vs. Q14TAG pH 8     | 0.0139         |
|                     | G11TAG pH 8 vs. Q14TAG pH 8    | 0.0071         |
|                     | S24TAG pH 8 vs. I33TAG pH 8    | 0.0521         |
|                     | S24TAG pH 8 vs. A44TAG pH 8    | 0.9973         |
|                     | I33TAG pH 8 vs. A44TAG pH 8    | 0.4091         |
| <b>pH 6 vs pH 6</b> | E8TAG pH 6 vs. G11TAG pH 6     | 0.7078         |
|                     | E8TAG pH 6 vs. Q14TAG pH 6     | <0.0001        |
|                     | G11TAG pH 6 vs. Q14TAG pH 6    | 0.0818         |
|                     | S24TAG pH 6 vs. I33TAG pH 6    | 0.9865         |
|                     | S24TAG pH 6 vs. A44TAG pH 6    | <0.0001        |
|                     | I33TAG pH 6 vs. A44TAG pH 6    | <0.0001        |

**Figure 6- table supplement 2**

P-values of relevant comparisons between cytosolic NTD TAG positions with cysteine at C477 at pH 8 and pH 6. P values were calculated using two-way ANOVA with Tukey's multiple comparisons test.

|                     | <b>TAG position comparison</b> | <b>P value</b> |
|---------------------|--------------------------------|----------------|
| <b>pH 8 vs pH 6</b> | G11TAG pH 8 vs. G11TAG pH 6    | 0.0381         |
|                     | Q14TAG pH 8 vs. Q14TAG pH 6    | 0.9759         |
|                     | S24TAG pH 8 vs. S24TAG pH 6    | 0.0075         |
| <b>pH 8 vs pH 8</b> | G11TAG pH 8 vs. Q14TAG pH 8    | 0.9732         |
|                     | G11TAG pH 8 vs. S24TAG pH 8    | 0.0259         |
|                     | Q14TAG pH 8 vs. S24TAG pH 8    | 0.4234         |
| <b>pH 6 vs pH 6</b> | G11TAG pH 6 vs. Q14TAG pH 6    | 0.6374         |
|                     | G11TAG pH 6 vs. S24TAG pH 6    | 0.2881         |
|                     | Q14TAG pH 6 vs. S24TAG pH 6    | 0.0015         |



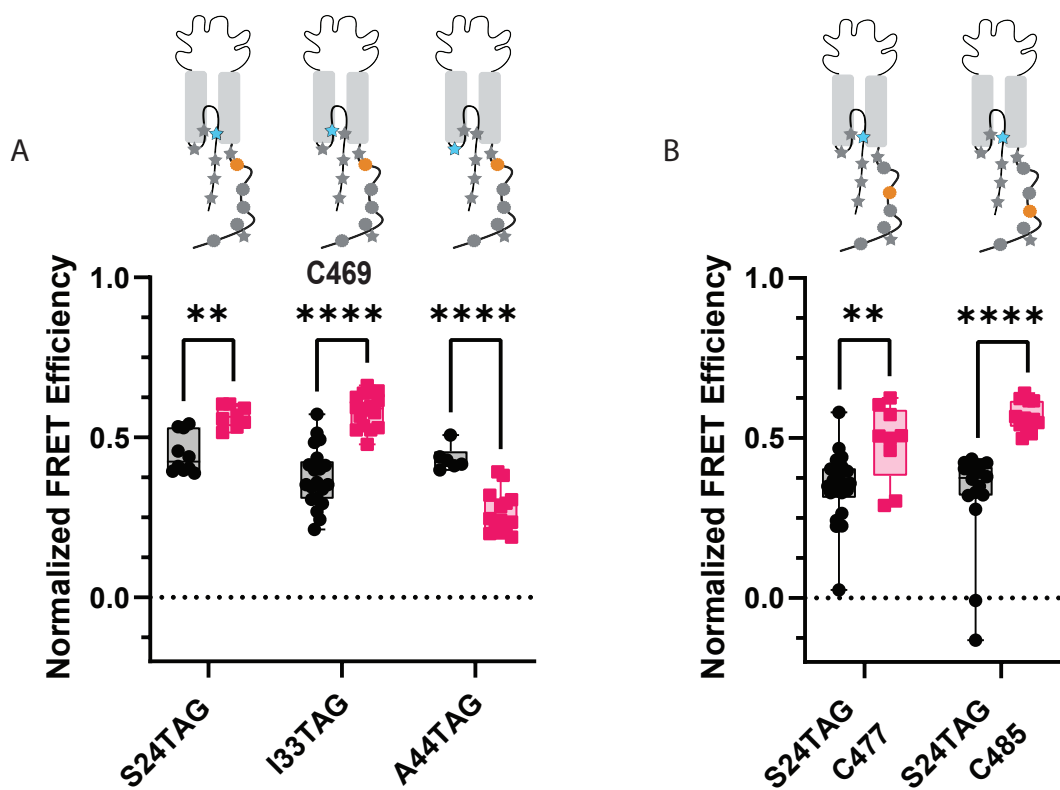

**Figure 7- figure supplement 1**

(A) Normalized FRET efficiency between L-ANAP in the reentrant loop and  $\text{Cu}^{2+}$ -TETAC at position C469 at pH 8 (black) and pH 6 (red). FRET efficiencies, SEM, N and calculated distances are summarized in Table 1. (B) Normalized FRET efficiency between L-ANAP incorporated at S24 and  $\text{Cu}^{2+}$ -TETAC at either C477 or C485. Box and whisker plot with whiskers ranging from minimum to maximum values and the bottom and top edges of the box denoting the 25<sup>th</sup> and 75<sup>th</sup> quartiles, respectively. Statistical significance shown using two-way ANOVA with Tukey's multiple comparisons test are denoted between relevant comparison using appropriate asterisks. Ns indicates  $p > 0.05$ , \* indicates  $p \leq 0.05$ , \*\* indicates  $p \leq 0.01$ , \*\*\* indicates  $p \leq 0.001$ , \*\*\*\* indicates  $p \leq 0.0001$ .

**Figure 7- table supplement 1**

P-values of relevant comparisons between cytosolic NTD TAG positions with cysteine at C485 at pH 8 and pH 6. P values were calculated using two-way ANOVA with Tukey's multiple comparisons test.

|                     | <b>TAG position comparison</b> | <b>P value</b> |
|---------------------|--------------------------------|----------------|
| <b>pH 8 vs pH 6</b> | E8 TAG pH 8 vs. E8 TAG pH 6    | 0.0065         |
|                     | G11 TAG pH 8 vs. G11 TAG pH 6  | <0.0001        |
|                     | Q14 TAG pH 8 vs. Q14 TAG pH 6  | <0.0001        |
|                     | S24 TAG pH 8 vs. S24 TAG pH 6  | <0.0001        |
| <b>pH 8 vs pH 8</b> | E8 TAG pH 8 vs. G11 TAG pH 8   | 0.0005         |
|                     | E8 TAG pH 8 vs. Q14 TAG pH 8   | 0.0323         |
|                     | E8 TAG pH 8 vs. S24 TAG pH 8   | <0.0001        |
|                     | G11 TAG pH 8 vs. Q14 TAG pH 8  | 0.6303         |
|                     | G11 TAG pH 8 vs. S24 TAG pH 8  | 0.9871         |
| <b>pH 6 vs pH 6</b> | Q14 TAG pH 8 vs. S24 TAG pH 8  | 0.0833         |
|                     | E8 TAG pH 6 vs. G11 TAG pH 6   | <0.0001        |
|                     | E8 TAG pH 6 vs. Q14 TAG pH 6   | <0.0001        |
|                     | E8 TAG pH 6 vs. S24 TAG pH 6   | <0.0001        |
|                     | G11 TAG pH 6 vs. Q14 TAG pH 6  | >0.9999        |

**Figure 7- table supplement 2**

P-values of relevant comparisons between cytosolic NTD TAG positions with cysteine at C505 at pH 8 and pH 6. P values were calculated using two-way ANOVA with Tukey's multiple comparisons test.

|                     | <b>TAG position comparison</b> | <b>P value</b> |
|---------------------|--------------------------------|----------------|
| <b>pH 8 vs pH 6</b> | E8 TAG pH 8 vs. E8 TAG pH 6    | 0.0019         |
|                     | Q14 TAG pH 8 vs. Q14 TAG pH 6  | 0.8454         |
| <b>pH 8 vs pH 8</b> | E8 TAG pH 8 vs. Q14 TAG pH 8   | 0.0008         |
| <b>pH 6 vs pH 6</b> | E8 TAG pH 6 vs. Q14 TAG pH 6   | 0.0944         |

**Figure 7- table supplement 3**

P-values of relevant comparisons between cytosolic NTD TAG positions with cysteine at C515 at pH 8 and pH 6. P values were calculated using two-way ANOVA with Tukey's multiple comparisons test.

|                     | <b>TAG position comparison</b> | <b>P value</b> |
|---------------------|--------------------------------|----------------|
| <b>pH 8 vs pH 6</b> | E8TAG pH 8 vs. E8TAG pH 6      | <0.0001        |
|                     | Q14TAG pH 8 vs. Q14TAG pH 6    | <0.0001        |
| <b>pH 8 vs pH 8</b> | E8TAG pH 8 vs. Q14TAG pH 8     | <0.0001        |
| <b>pH 6 vs pH 6</b> | E8TAG pH 6 vs. Q14TAG pH 6     | <0.0001        |

**Figure 8- table supplement 1**

P-values of relevant comparisons between NTD TAG positions with the plasma membrane at pH 8 and pH 6. P values were calculated using two-way ANOVA with Tukey's multiple comparisons test.

|                     | <b>TAG position comparison</b> | <b>P value</b> |
|---------------------|--------------------------------|----------------|
| <b>pH 8 vs pH 6</b> | E8TAG pH 8 vs. E8TAG pH 6      | 0.9998         |
|                     | G11TAG pH 8 vs. G11TAG pH 6    | 0.9975         |
|                     | Q14TAG pH 8 vs. Q14TAG pH 6    | 0.0032         |
|                     | S24TAG pH 8 vs. S24TAG pH 6    | >0.9999        |
|                     | I33TAG pH 8 vs. I33TAG pH 6    | 0.0001         |
| <b>pH 8 vs pH 8</b> | E8TAG pH 8 vs. G11TAG pH 8     | 0.9949         |
|                     | E8TAG pH 8 vs. Q14TAG pH 8     | >0.9999        |
|                     | G11TAG pH 8 vs. Q14TAG pH 8    | >0.9999        |
|                     | S24TAG pH 8 vs. I33TAG pH 8    | 0.0092         |
| <b>pH 6 vs pH 6</b> | E8TAG pH 6 vs. G11TAG pH 6     | 0.1550         |
|                     | E8TAG pH 6 vs. Q14TAG pH 6     | <0.0001        |
|                     | G11TAG pH 6 vs. Q14TAG pH 6    | 0.0576         |
|                     | S24TAG pH 6 vs. I33TAG pH 6    | >0.9999        |

**Figure 8- table supplement 2**

P-values of relevant comparisons between CTD TAG positions with the plasma membrane at pH 8 and pH 6. P values were calculated using two-way ANOVA with Tukey's multiple comparisons test.

|                     | <b>TAG position comparison</b> | <b>P value</b> |
|---------------------|--------------------------------|----------------|
| <b>pH 8 vs pH 6</b> | 464TAG pH 8 vs. 464TAG pH 6    | 0.8153         |
|                     | 505TAG pH 8 vs. 505TAG pH 6    | <0.0001        |
| <b>pH 8 vs pH 8</b> | 464TAG pH 8 vs. 505TAG pH 8    | 0.8693         |
| <b>pH 6 vs pH 6</b> | 464TAG pH 6 vs. 505TAG pH 6    | 0.0366         |
